# Supplementary material for: Impact of work–life interference on burnout and job discontent: A one-year follow-up study of physicians in Sweden
Source: PubMed Central journal article supplement (PMC11473125; doi:10.5271/sjweh.4181), 2024-10-01
Supplement: SJWEH-50-519-S001.pdf [file SJWEH-50-519-S001.pdf]

# Impact of work–life interference on burnout and job discontent: A one-year follow-up study of physicians in Sweden<sup>1</sup>

by Britta E Gynning, MS,<sup>2</sup> Filip Christiansen, MD, Ulrik Lidwall PhD, Emma Brulin, PhD

1. Supplementary material
2. Correspondence to: Britta E Gynning, IMM, Karolinska Institutet, Nobels väg 13, 171 65 Solna, Sweden. [E-mail: Britta.elsert.gynning@ki.se]

| Table S1. Exposure and outcome items |                                                                                 |                                                                                                                      |
|--------------------------------------|---------------------------------------------------------------------------------|----------------------------------------------------------------------------------------------------------------------|
| EXPOSURE                             | ITEM                                                                            | RESPONSE ALTERNATIVES                                                                                                |
| Work Life Interference               | When I come home from work, I am too tired to do the things I would like to do. | 1=Not at all; 2=Rarely; 3=Sometimes; 4=Often; 5=Almost all the time                                                  |
|                                      | My private life does not look the way I would like it to because of my work.    | 1=Not at all; 2=Rarely; 3=Sometimes; 4=Often; 5=Almost all the time                                                  |
|                                      | I overlook personal problems because of the demands of my work.                 | 1=Not at all; 2=Rarely; 3=Sometimes; 4=Often; 5=Almost all the time                                                  |
|                                      | My personal life suffers because of my work.                                    | 1=Not at all; 2=Rarely; 3=Sometimes; 4=Often; 5=Almost all the time                                                  |
|                                      | I change and adapt my personal life to the demands of the workplace.            | 1=Not at all; 2=Rarely; 3=Sometimes; 4=Often; 5=Almost all the time                                                  |
| OUTCOME                              | ITEM                                                                            | RESPONSE ALTERNATIVES                                                                                                |
| BAT-12                               | I feel mentally exhausted                                                       | 1=Not at all; 2=Rarely; 3=Sometimes; 4=Often; 5=Almost all the time                                                  |
|                                      | I find it hard to recover my energy                                             | 1=Not at all; 2=Rarely; 3=Sometimes; 4=Often; 5=Almost all the time                                                  |
|                                      | I feel physically exhausted                                                     | 1=Not at all; 2=Rarely; 3=Sometimes; 4=Often; 5=Almost all the time                                                  |
|                                      | I struggle to find any enthusiasm for my work                                   | 1=Not at all; 2=Rarely; 3=Sometimes; 4=Often; 5=Almost all the time                                                  |
|                                      | I feel a strong aversion towards my job                                         | 1=Not at all; 2=Rarely; 3=Sometimes; 4=Often; 5=Almost all the time                                                  |
|                                      | I'm cynical about what my work means to others                                  | 1=Not at all; 2=Rarely; 3=Sometimes; 4=Often; 5=Almost all the time                                                  |
|                                      | I have trouble staying focused                                                  | 1=Not at all; 2=Rarely; 3=Sometimes; 4=Often; 5=Almost all the time                                                  |
|                                      | I have trouble concentrating                                                    | 1=Not at all; 2=Rarely; 3=Sometimes; 4=Often; 5=Almost all the time                                                  |
|                                      | I make mistakes because I have my mind on other things                          | 1=Not at all; 2=Rarely; 3=Sometimes; 4=Often; 5=Almost all the time                                                  |
|                                      | I feel unable to control my emotions                                            | 1=Not at all; 2=Rarely; 3=Sometimes; 4=Often; 5=Almost all the time                                                  |
|                                      | I do not recognize myself in the way I react emotionally                        | 1=Not at all; 2=Rarely; 3=Sometimes; 4=Often; 5=Almost all the time                                                  |
| I may overreact unintentionally      | 1=Not at all; 2=Rarely; 3=Sometimes; 4=Often; 5=Almost all the time             |                                                                                                                      |
| Job Dissatisfaction                  | How satisfied or dissatisfied are you with your job?                            | 1=Very satisfied; 2=Quite satisfied; 3=Neither satisfied nor dissatisfied; 4=Quite dissatisfied; 5=Very dissatisfied |
| Turnover Intention                   | In the last 12 months, how often have you considered looking for a new job?     | 1=Every day; 2=Some/few times a week; 3=Some/few times a month; 4=Some/few times in the last 12 months; 5=Never      |

| <b>Table S2: Associations between experiences of Work-Life Interference in 2021 (per one unit increase) and High risk of burnout in 2022, adjusted for potential confounders*</b> |                              |                  |                          |                  |
|-----------------------------------------------------------------------------------------------------------------------------------------------------------------------------------|------------------------------|------------------|--------------------------|------------------|
|                                                                                                                                                                                   | <b>Crude (Unadjusted OR)</b> |                  | <b>Model 1*</b>          |                  |
| <b>n</b>                                                                                                                                                                          |                              |                  | 1463                     |                  |
|                                                                                                                                                                                   | OR(95% CI)                   | P-value          | OR(95% CI)               | P-value          |
| <b>Work-Life Interference 21‡</b>                                                                                                                                                 | <i>3.67(2.78-4.83)</i>       | <i>&lt;.001</i>  | <i>1.53(1.05-2.25)</i>   | <i>0.029</i>     |
| <b>High risk of burnout 2021‡</b>                                                                                                                                                 | <i>19.98(12.33-32.37)</i>    | <i>&lt;0.001</i> | <i>14.53(8.39-25.16)</i> | <i>&lt;0.001</i> |
| <b>Sex</b>                                                                                                                                                                        |                              |                  |                          |                  |
| Women (ref. Men)                                                                                                                                                                  | 1.23(0.79-1.92)              | 0.355            | 0.96(0.54-1.69)          | 0.880            |
| <b>Rank</b>                                                                                                                                                                       |                              |                  |                          |                  |
| Consultant (ref.)                                                                                                                                                                 | <i>1</i>                     | <i>0.008</i>     | <i>1</i>                 | <i>0.042</i>     |
| Specialists                                                                                                                                                                       | <i>1.91(1.02-3.58)</i>       | <i>0.043</i>     | <i>2.19(0.97-4.96)</i>   | <i>0.061</i>     |
| Physicians in training                                                                                                                                                            | <i>2.79(1.44-5.05)</i>       | <i>0.002</i>     | <i>2.84(1.26-6.42)</i>   | <i>0.012</i>     |
| <b>Family situation</b>                                                                                                                                                           |                              |                  |                          |                  |
| Living alone (ref.)                                                                                                                                                               | <i>1</i>                     |                  | <i>1</i>                 | <i>0.783</i>     |
| Living with only children                                                                                                                                                         | <i>1.04(0.38-2.85)</i>       | <i>0.947</i>     | <i>0.77(0.18-3.21)</i>   | <i>0.718</i>     |
| Living with only a partner                                                                                                                                                        | <i>0.45(0.21-0.96)</i>       | <i>0.039</i>     | <i>0.59(0.21-1.64)</i>   | <i>0.309</i>     |
| Living with a partner and children                                                                                                                                                | <i>0.67(0.35-1.25)</i>       | <i>0.207</i>     | <i>0.77(0.33-1.83)</i>   | <i>0.560</i>     |
| <b>Time at work</b>                                                                                                                                                               |                              |                  |                          |                  |
| Work hours <36h (ref.)                                                                                                                                                            | <i>1</i>                     | <i>0.246</i>     | <i>1</i>                 | <i>0.410</i>     |
| Work hours 36-45h                                                                                                                                                                 | <i>0.66(0.38-1.17)</i>       | <i>0.154</i>     | <i>0.61(0.29-1.29)</i>   | <i>0.197</i>     |
| Work hours >45h                                                                                                                                                                   | <i>0.93(0.51-1.68)</i>       | <i>0.799</i>     | <i>0.61(0.26-1.44)</i>   | <i>0.260</i>     |
| Overtime - rarely (ref.)                                                                                                                                                          | <i>1</i>                     | <i>0.560</i>     | <i>1</i>                 | <i>0.560</i>     |
| Overtime - sometimes                                                                                                                                                              | <i>1.51(0.64-3.55)</i>       | <i>0.343</i>     | <i>1.70(0.55-5.23)</i>   | <i>0.357</i>     |
| Overtime - often                                                                                                                                                                  | <i>2.22(1.09-4.52)</i>       | <i>0.028</i>     | <i>1.18(0.44-3.14)</i>   | <i>0.739</i>     |
| <b>Work with COVID-19 patient</b>                                                                                                                                                 |                              |                  |                          |                  |
| No (ref.)                                                                                                                                                                         | <i>1</i>                     | <i>0.698</i>     | <i>1</i>                 | <i>0.787</i>     |
| Some work shifts                                                                                                                                                                  | <i>1.32(0.69-2.54)</i>       | <i>0.400</i>     | <i>0.94(0.41-2.18)</i>   | <i>0.893</i>     |
| Entire pandemic                                                                                                                                                                   | <i>1.20(0.68-2.11)</i>       | <i>0.533</i>     | <i>0.80(0.38-1.67)</i>   | <i>0.548</i>     |
| <b>Nagelkerke R Square</b>                                                                                                                                                        |                              |                  | 0.445                    |                  |
| <i>Text in italics indicated p-value &lt;0.05</i>                                                                                                                                 |                              |                  |                          |                  |
| ‡ Continuous, scale 1-5                                                                                                                                                           |                              |                  |                          |                  |
| *Adjusted for sex, rank, family situation, time at work (work hours & overtime) & work with COVID-19 patients                                                                     |                              |                  |                          |                  |

| <b>Table S3: Associations between experiences of Work-Life Interference in 2021 (per one unit increase) and Job Dissatisfaction in 2022, adjusted for potential confounders*</b> |                              |                  |                        |                  |
|----------------------------------------------------------------------------------------------------------------------------------------------------------------------------------|------------------------------|------------------|------------------------|------------------|
|                                                                                                                                                                                  | <b>Crude (Unadjusted OR)</b> |                  | <b>Model 1*</b>        |                  |
| <b>n</b>                                                                                                                                                                         |                              |                  | 1524                   |                  |
|                                                                                                                                                                                  | OR(95% CI)                   | P-value          | OR(95% CI)             | P-value          |
| <b>Work-Life Interference 21<sup>‡</sup></b>                                                                                                                                     | <i>2.51(2.10-2.99)</i>       | <i>&lt;0.001</i> | <i>2.06(1.68-2.54)</i> | <i>&lt;0.001</i> |
| <b>High Job Dissatisfaction 21<sup>†</sup></b>                                                                                                                                   | <i>9.51(6.67-13.58)</i>      | <i>0.001</i>     | <i>5.82(3.93-8.64)</i> | <i>&lt;0.001</i> |
| <b>Sex</b>                                                                                                                                                                       |                              |                  |                        |                  |
| Women (ref. Men)                                                                                                                                                                 | 1.13(0.83-1.53)              | 0.441            | 0.87(0.61-1.24)        | 0.435            |
| <b>Rank</b>                                                                                                                                                                      |                              |                  |                        |                  |
| Consultant (ref.)                                                                                                                                                                | <i>1</i>                     | <i>0.001</i>     | <i>1</i>               | <i>0.004</i>     |
| Specialists                                                                                                                                                                      | <i>1.71(1.13-2.61)</i>       | <i>0.011</i>     | <i>1.90(1.18-3.08)</i> | <i>0.009</i>     |
| Physicians in training                                                                                                                                                           | <i>2.22(1.45-3.39)</i>       | <i>&lt;.001</i>  | <i>2.27(1.38-3.74)</i> | <i>0.001</i>     |
| <b>Family situation</b>                                                                                                                                                          |                              |                  |                        |                  |
| Living alone (ref.)                                                                                                                                                              | <i>1</i>                     | <i>0.254</i>     | <i>1</i>               | <i>0.925</i>     |
| Living with only children                                                                                                                                                        | <i>1.21(.56-2.59)</i>        | <i>0.631</i>     | <i>0.98(0.39-2.47)</i> | <i>0.974</i>     |
| Living with only a partner                                                                                                                                                       | <i>0.65(0.38-1.13)</i>       | <i>0.130</i>     | <i>0.82(0.44-1.53)</i> | <i>0.528</i>     |
| Living with a partner and children                                                                                                                                               | <i>0.39(0.50-1.31)</i>       | <i>0.393</i>     | <i>0.88(0.51-1.53)</i> | <i>0.652</i>     |
| <b>Time at work</b>                                                                                                                                                              |                              |                  |                        |                  |
| Work hours <36h (ref.)                                                                                                                                                           | <i>1</i>                     | <i>0.005</i>     | <i>1</i>               | <i>0.051</i>     |
| Work hours 36-45h                                                                                                                                                                | <i>0.79(0.52-1.22)</i>       | <i>0.286</i>     | <i>0.55(0.34-0.91)</i> | <i>0.019</i>     |
| Work hours >45h                                                                                                                                                                  | <i>1.39(.89-2.15)</i>        | <i>0.147</i>     | <i>0.72(0.42-1.24)</i> | <i>0.239</i>     |
| Overtime - rarely (ref.)                                                                                                                                                         | <i>1</i>                     | <i>&lt;0.001</i> | <i>1</i>               | <i>0.213</i>     |
| Overtime – sometimes                                                                                                                                                             | <i>2.20(1.12-4.34)</i>       | <i>0.023</i>     | <i>1.55(0.75-3.21)</i> | <i>0.241</i>     |
| Overtime – often                                                                                                                                                                 | <i>3.86(2.15-6.91)</i>       | <i>&lt;0.001</i> | <i>1.77(0.93-3.37)</i> | <i>0.081</i>     |
| <b>Work with COVID-19 patient</b>                                                                                                                                                |                              |                  |                        |                  |
| No (ref.)                                                                                                                                                                        | <i>1</i>                     | <i>0.499</i>     | <i>1</i>               | <i>0.441</i>     |
| Some work shifts                                                                                                                                                                 | <i>1.07(0.67-1.72)</i>       | <i>0.280</i>     | <i>0.70(0.41-1.22)</i> | <i>0.210</i>     |
| Entire pandemic                                                                                                                                                                  | <i>1.24(0.84-1.83)</i>       | <i>0.769</i>     | <i>0.79(0.50-1.26)</i> | <i>0.322</i>     |
| <b>Nagelkerke R Square</b>                                                                                                                                                       |                              |                  | 0.269                  |                  |
| <i>Text in italics indicates p-value &lt;0.05</i>                                                                                                                                |                              |                  |                        |                  |
| <sup>‡</sup> Continuous, scale 1-5                                                                                                                                               |                              |                  |                        |                  |
| <sup>†</sup> Dichotomized, Ref. Low dissatisfaction                                                                                                                              |                              |                  |                        |                  |
| *Adjusted for sex, rank, family situation, time at work (work hours & overtime) & work with COVID-19 patients                                                                    |                              |                  |                        |                  |

| <b>Table S4: Associations between experiences of Work-Life Interference in 2021 (per one unit increase) and Turnover Intention in 2022, adjusted for potential confounders*</b> |                              |                  |                        |                  |
|---------------------------------------------------------------------------------------------------------------------------------------------------------------------------------|------------------------------|------------------|------------------------|------------------|
|                                                                                                                                                                                 | <b>Crude (Unadjusted OR)</b> |                  | <b>Model 1*</b>        |                  |
| <b>n</b>                                                                                                                                                                        |                              |                  | 1525                   |                  |
|                                                                                                                                                                                 | OR(95% CI)                   | P value          | OR(95% CI)             | P value          |
| <b>Work-Life Interference 21<sup>‡</sup></b>                                                                                                                                    | <i>2.28(2.02-2.58)</i>       | <i>&lt;0.001</i> | <i>1.72(1.47-2.00)</i> | <i>&lt;0.001</i> |
| <b>Turnover Intention last day/week/month 21<sup>†</sup></b>                                                                                                                    | <i>10.45(8.14-13.42)</i>     | <i>&lt;0.001</i> | <i>7.37(5.61-9.67)</i> | <i>&lt;0.001</i> |
| <b>Sex</b>                                                                                                                                                                      |                              |                  |                        |                  |
| Women (ref. Men)                                                                                                                                                                | 1.08(0.87-1.34)              | 0.485            | 0.86(0.66-1.12)        | 0.250            |
| <b>Rank</b>                                                                                                                                                                     |                              |                  |                        |                  |
| Consultant (ref.)                                                                                                                                                               | <i>1</i>                     | <i>&lt;0.001</i> | <i>1</i>               | <i>0.011</i>     |
| Specialists                                                                                                                                                                     | <i>1.39(1.06-1.82)</i>       | <i>0.018</i>     | 1.35(0.96-1.89)        | 0.085            |
| Physicians in training                                                                                                                                                          | <i>1.95(1.47-2.58)</i>       | <i>&lt;0.001</i> | <i>1.72(1.2-2.45)</i>  | <i>0.003</i>     |
| <b>Family situation</b>                                                                                                                                                         |                              |                  |                        |                  |
| Living alone (ref.)                                                                                                                                                             | <i>1</i>                     | <i>0.002</i>     | <i>1</i>               | <i>0.048</i>     |
| Living with only children                                                                                                                                                       | 0.640(0.35-1.17)             | 0.146            | 0.52(0.24-1.11)        | 0.091            |
| Living with only a partner                                                                                                                                                      | <i>0.52(0.35-0.78)</i>       | <i>&lt;0.001</i> | 0.53(0.33-0.85)        | 0.009            |
| Living with a partner and children                                                                                                                                              | 0.84(0.59-1.18)              | 0.313            | 0.71(0.46-1.08)        | 0.11             |
| <b>Time at work</b>                                                                                                                                                             |                              |                  |                        |                  |
| Work hours <36h (ref.)                                                                                                                                                          | <i>1</i>                     | <i>0.002</i>     | <i>1</i>               | <i>0.205</i>     |
| Work hours 36-45h                                                                                                                                                               | 1.07(0.79-1.45)              | 0.651            | 0.71(0.49-1.04)        | 0.075            |
| Work hours >45h                                                                                                                                                                 | <i>1.58(1.14-2.18)</i>       | <i>0.006</i>     | 0.76(0.5-1.17)         | 0.218            |
| Overtime - rarely (ref.)                                                                                                                                                        | <i>1</i>                     | <i>&lt;0.001</i> | <i>1</i>               | <i>0.746</i>     |
| Overtime – sometimes                                                                                                                                                            | <i>1.55(1.05-2.30)</i>       | <i>&lt;0.001</i> | 1.18(0.75-1.86)        | 0.475            |
| Overtime – often                                                                                                                                                                | <i>2.70(1.96-3.73)</i>       | <i>0.027</i>     | 1.15(0.77-1.71)        | 0.493            |
| <b>Work with COVID-19 patient</b>                                                                                                                                               |                              |                  |                        |                  |
| No (ref.)                                                                                                                                                                       | <i>1</i>                     | <i>&lt;0.001</i> | <i>1</i>               | <i>0.019</i>     |
| Some work shifts                                                                                                                                                                | <i>1.97(1.40-2.76)</i>       | <i>&lt;0.001</i> | <i>1.56(1.04-2.36)</i> | <i>0.033</i>     |
| Entire pandemic                                                                                                                                                                 | <i>2.12(1.58-2.84)</i>       | <i>&lt;0.001</i> | <i>1.67(1.16-2.39)</i> | <i>0.005</i>     |
| <b>Nagelkerke R Square</b>                                                                                                                                                      |                              |                  | 0.478                  |                  |
| <i>Text in italics indicates p-value &lt;0.05</i>                                                                                                                               |                              |                  |                        |                  |
| <sup>‡</sup> Continuous, scale 1-5                                                                                                                                              |                              |                  |                        |                  |
| <sup>†</sup> Dichotomized, Ref. Low dissatisfaction                                                                                                                             |                              |                  |                        |                  |
| *Adjusted for sex, rank, family situation, time at work (work hours & overtime) & work with COVID-19 patients                                                                   |                              |                  |                        |                  |

| <b>Table S4. Missing Value Analysis of Work-Life Interference, High Risk of Burnout, Job Dissatisfaction and Turnover Intention</b> |                               |             |                                |             |                            |             |                           |             |
|-------------------------------------------------------------------------------------------------------------------------------------|-------------------------------|-------------|--------------------------------|-------------|----------------------------|-------------|---------------------------|-------------|
|                                                                                                                                     | <b>Work-Life Interference</b> |             | <b>High Risk of Burnout 21</b> |             | <b>Job Dissatisfaction</b> |             | <b>Turnover Intention</b> |             |
|                                                                                                                                     | <i>2021</i>                   | <i>2022</i> | <i>2021</i>                    | <i>2022</i> | <i>2021</i>                | <i>2022</i> | <i>2021</i>               | <i>2022</i> |
|                                                                                                                                     | %                             | %           | %                              | %           | %                          | %           | %                         | %           |
| Missing Values                                                                                                                      | 10(0.6)                       | 14(0.9)     | 30(1.9)                        | 43(2.7)     | 4(0.3)                     | 3(0.2)      | 5(0.3)                    | 3(0.2)      |
| <b>Sex</b>                                                                                                                          |                               |             |                                |             |                            |             |                           |             |
| Men                                                                                                                                 | 0.9                           | 1.0         | 2.2                            | 2.5         | 0.4                        | 0.1         | 0.3                       | 0.1         |
| Women                                                                                                                               | 0.5                           | 0.8         | 1.7                            | 2.9         | 0.1                        | 0.2         | 0.3                       | 0.2         |
| <b>Age</b>                                                                                                                          |                               |             |                                |             |                            |             |                           |             |
| 27-37                                                                                                                               | 0.7                           | 0.2         | 1.2                            | 2.4         | 0.2                        | 0.0         | 0.7                       | 0.0         |
| 28-44                                                                                                                               | 0.3                           | 0.5         | 1.8                            | 1.8         | 0.3                        | 0.3         | 0.5                       | 0.5         |
| 45-55                                                                                                                               | 0.5                           | 1.5         | 2.3                            | 3.3         | 0.5                        | 0.0         | 0.0                       | 0.3         |
| 56-75                                                                                                                               | 1.0                           | 1.3         | 2.3                            | 3.4         | 0.0                        | 0.5         | 0.0                       | 0.0         |
| <b>Family Situation</b>                                                                                                             |                               |             |                                |             |                            |             |                           |             |
| Living alone                                                                                                                        | 0.6                           | 1.9         | 3.2                            | 3.8         | 0.0                        | 0.6         | 1.3                       | 0.0         |
| Living with only children                                                                                                           | 1.4                           | 1.4         | 1.4                            | 2.9         | 0.0                        | 0.0         | 0.0                       | 0.0         |
| Living with only partner                                                                                                            | 0.5                           | 0.5         | 2.1                            | 3.4         | 0.0                        | 0.3         | 0.0                       | 0.0         |
| Living with partner and children                                                                                                    | 0.6                           | 0.7         | 1.6                            | 2.3         | 0.4                        | 0.1         | 0.3                       | 0.3         |
| <b>Rank</b>                                                                                                                         |                               |             |                                |             |                            |             |                           |             |
| Physicians in training                                                                                                              | 0.8                           | 0.6         | 1.3                            | 2.5         | 0.2                        | 0.2         | 0.6                       | 0.2         |
| Specialist                                                                                                                          | 0.2                           | 0.9         | 2.3                            | 2.8         | 0.3                        | 0.2         | 0.3                       | 0.2         |
| Consultants                                                                                                                         | 1.1                           | 0.9         | 2.0                            | 2.9         | 0.2                        | 0.2         | 0.0                       | 0.2         |
| <b>Workhours</b>                                                                                                                    |                               |             |                                |             |                            |             |                           |             |
| Under 36h/w                                                                                                                         | 0.0                           | 0.7         | 3.0                            | 2.6         | 0.4                        | 0.4         | 0.4                       | 0.0         |
| 34-45h/w                                                                                                                            | 1.1                           | 0.6         | 1.6                            | 2.3         | 0.2                        | 0.1         | 0.5                       | 0.4         |
| Over 45h/w                                                                                                                          | 0.2                           | 1.5         | 1.9                            | 3.7         | 0.2                        | 0.2         | 0.0                       | 0.0         |
| <b>Overtime per week</b>                                                                                                            |                               |             |                                |             |                            |             |                           |             |
| Rarely                                                                                                                              | 0.4                           | 1.0         | 2.1                            | 2.4         | 0.4                        | 0.1         | 0.2                       | 0.1         |
| Several times/m                                                                                                                     | 1.3                           | 0.7         | 0.7                            | 2.6         | 0.0                        | 0.3         | 0.0                       | 0.0         |
| Several times/w                                                                                                                     | 0.3                           | 0.3         | 2.7                            | 4.1         | 0.0                        | 0.3         | 0.7                       | 0.7         |
| <b>Work with COVID-19 patients</b>                                                                                                  |                               |             |                                |             |                            |             |                           |             |
| No                                                                                                                                  | 0.6                           | 0.8         | 1.7                            | 2.4         | 0.3                        | 0.1         | 0.5                       | 0.2         |
| Some shifts                                                                                                                         | 0.3                           | 1.1         | 2.3                            | 3.1         | 0.3                        | 0.6         | 0.0                       | 0.3         |
| Entire pandemic                                                                                                                     | 0.9                           | 0.9         | 1.7                            | 3.1         | 0.0                        | 0.0         | 0.0                       | 0.0         |
